# Supplementary material for: Competitiveness for Nodule Colonization in Sinorhizobium meliloti: Combined In Vitro-Tagged Strain Competition and Genome-Wide Association Analysis
Source: PubMed Central journal article supplement (PMC8407117; doi:10.1128/msystems.00550-21), 2021-07-27

A

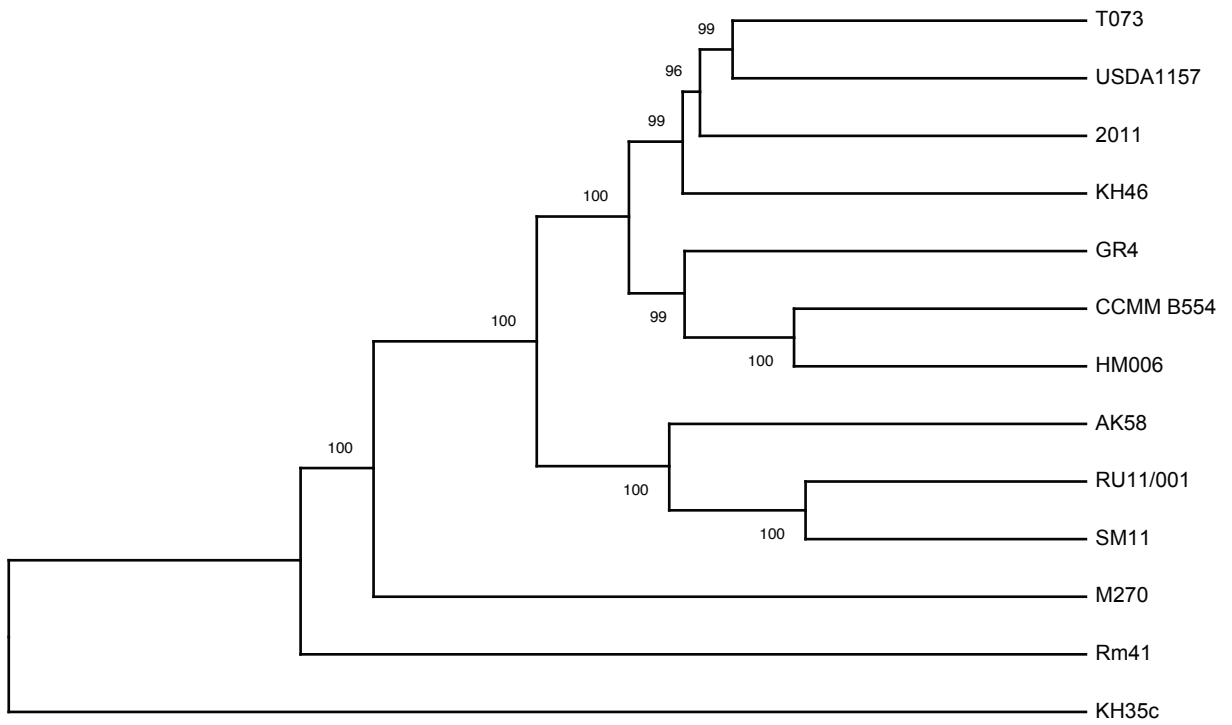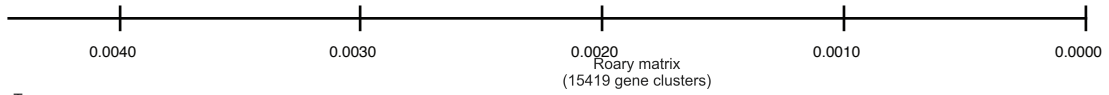

B

Tree  
(13 strains)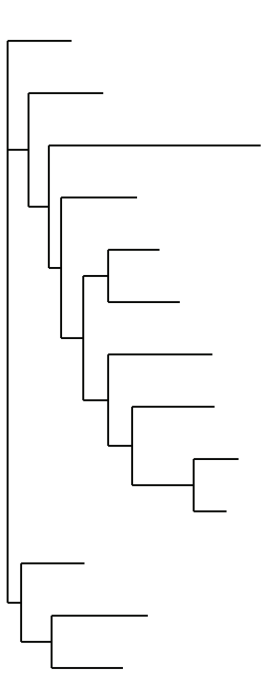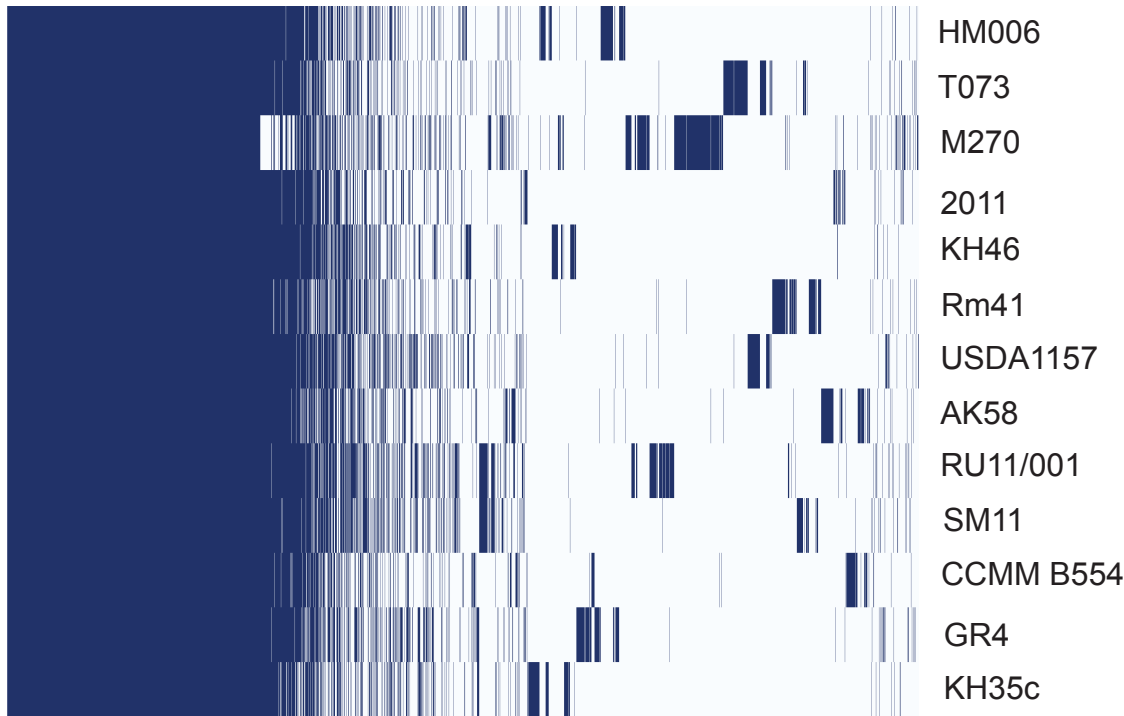

C

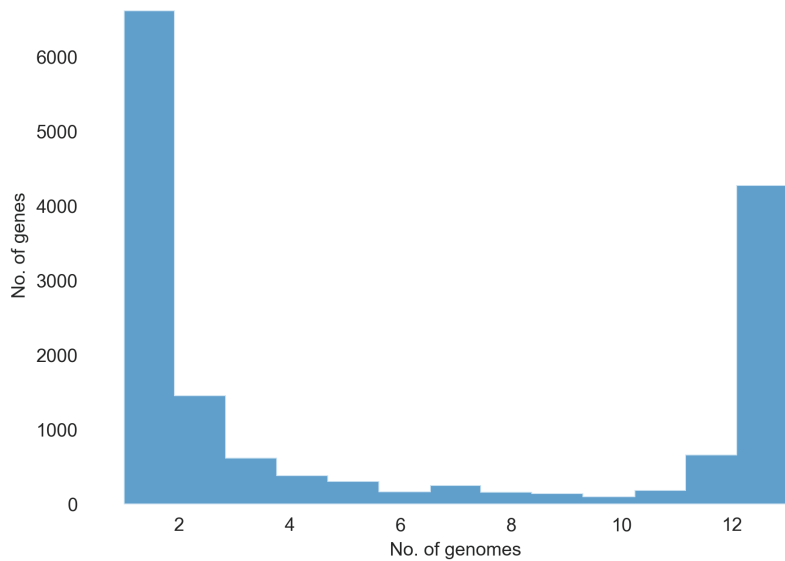

D

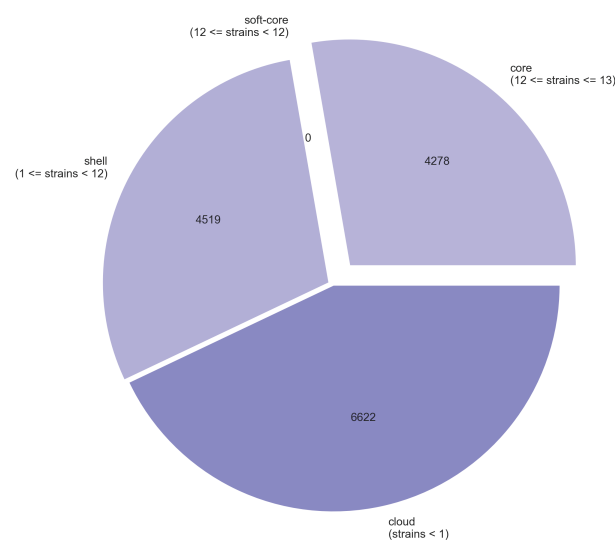

Supplement: msystems.00550-21-sf001.pdf [file msystems.00550-21-sf001.pdf]
